# Supplementary material for: Genome Mining of a Tribrid Biosynthetic Gene Cluster Family in Bacteria
Source: Research Square preprint supplement (doi:10.21203/rs.3.rs-4933575/v1), 2025-12-02
Supplement: Supplementary file 2 [file e614724d367353a7cd55fda5.xlsx]

## Sheet: strains and plasmids
Strains, mutants, and plasmids used in this study
Strains	Description	Source
Paraburkholderia megapolitana DSM 23488	P. megapolitana DSM 23488 wild type strain	Deutsche Sammlung von Mikroorganismen und Zellkulturen (DSMZ)
Chitinimonas koreensis DSM 17726	C. koreensis DSM 17726 wild type strain	Deutsche Sammlung von Mikroorganismen und Zellkulturen (DSMZ)
Chromobacterium subtsugae ATCC 31532	C. subtsugae ATCC 31532 wild type strain	American Type Culture Collection (ATCC)
Caldimonas brevitalea DSM 7029Δglb	C. brevitalea DSM 7029 (K481-B101; ATCC 53080) mutant deficient of glidobactin (glb) biosynthetic gene cluster	Wang, X., Zhou, H. B., Chen, H. N., Jing, X. S., Zheng, W. T., Li, R. J., Sun, T., Liu, J. Q., Fu, J., Huo, L. J., Li, Y. Z., Shen, Y. M., Ding, X. M., Müller, R., Bian, X. Y. & Zhang, Y. M. Discovery of recombinases enables genome mining of cryptic biosynthetic gene clusters in Burkholderiales species. Proc. Natl. Acad. Sci. U S A. 115, E4255-E4263 (2018).
E. coli GB05RedTrfA	DH10B, fhuA::IS2, ΔybcC, ΔrecET, PRhaSR-γβαA, PBAD-trfA, with a rhamnose-inducible γβαAA operon (redγ, redβ, redα and recA), and an arabinose-inducible trfA gene integrated at the ybcC locus in the chromosome.	Wang H, Li Z, Jia R, Hou Y, Yin J, Bian X, Li A, Müller R, Stewart AF, Fu J, Zhang Y. RecET direct cloning and Redαβ recombineering of biosynthetic gene clusters, large operons or single genes for heterologous expression. Nat Protoc. 11(7):1175-1190 (2016).
E. coli GB05-dir	ET operon under PBAD promoter were inserted at the ybcC locus of E. coli GB2005	Fu, J., Bian, X. Y., Hu, S. B., Wang, H. L., Huang, F., Seibert, P. M., Plaza, A., Xia, L.Q., Müller, R., Stewart, A. F. & Zhang, Y. M. Full-length RecE enhances linear-linear homologous recombination and facilitates direct cloning for bioprospecting Nat. Biotechnol. 30, 440-446 (2012).
E. coli GB08-red	Lambda red operon and recA under PBAD promoter were inserted at the ybcC locus of Escherichia coli GB2005	Fu, J., Bian, X. Y., Hu, S. B., Wang, H. L., Huang, F., Seibert, P. M., Plaza, A., Xia, L.Q., Müller, R., Stewart, A. F. & Zhang, Y. M. Full-length RecE enhances linear-linear homologous recombination and facilitates direct cloning for bioprospecting Nat. Biotechnol. 30, 440-446 (2012).
E. coli GBred-gyr462	Lambda red operon and recA under PBAD promoter were inserted at the ybcC locus of E. coli GB2005, GyrA mutation of Arg462Cys	Wang, H. L., Bian, X. Y., Xia, L. Q., Ding, X. Z., Müller, R., Zhang, Y. M., Fu, J. & Stewart, A. F. Improved seamless mutagenesis by recombineering using ccdB for counterselection. Nucleic Acids Res. 42, e37-e37 (2014).
E. coli GB2005	(HS996, ΔrecET, ΔybcC). Deficient of the endogenous recET and the DLP12 prophage ybcC encoding a putative exonuclease similar to the Redα	Fu, J., Bian, X. Y., Hu, S. B., Wang, H. L., Huang, F., Seibert, P. M., Plaza, A., Xia, L.Q., Müller, R., Stewart, A. F. & Zhang, Y. M. Full-length RecE enhances linear-linear homologous recombination and facilitates direct cloning for bioprospecting Nat. Biotechnol. 30, 440-446 (2012).
E.coli GBdir-pir116	DH10B, fhuA::IS2, ΔybcC, ΔrecET, pir116, with an arabinose-inducible ETγA operon (full-length recE, recT, redγ and recA), and a copy-up pir116 gene in chromosome	Wang H, Li Z, Jia R, Hou Y, Yin J, Bian X, Li A, Müller R, Stewart AF, Fu J, Zhang Y. RecET direct cloning and Redαβ recombineering of biosynthetic gene clusters, large operons or single genes for heterologous expression. Nat Protoc. 11(7):1175-1190 (2016).
Mutants	Characteristics	Source
DSM 23488::Papra-BGC5	P. megapolitana DSM 23488 mutant with the insertion of constitutive promoter Papra upstream of mgp biosynthetic gene cluster	Zheng W, Wang X, Zhou H, Zhang Y, Li A, Bian X. Establishment of recombineering genome editing system in Paraburkholderia megapolitana empowers activation of silent biosynthetic gene clusters. Microb Biotechnol. 13(2):397-405 (2020)
DSM 23488-ΔBGC5	P. megapolitana DSM 23488 mutant deficient of mgp biosynthetic gene cluster	Zheng W, Wang X, Zhou H, Zhang Y, Li A, Bian X. Establishment of recombineering genome editing system in Paraburkholderia megapolitana empowers activation of silent biosynthetic gene clusters. Microb Biotechnol. 13(2):397-405 (2020)
DSM 7029Δglb::ctp	C. brevitalea DSM 7029Δglb harboring the ctp biosynthetic gene cluster at the glb locus in the chromosome, with the ctp biosynthetic gene cluster under the control of constitutive promoter P13.	This study
ATCC 31532ΔchpA	C. subtsugae ATCC 31532 mutant deficient of chpA with apraR via double crossover	This study
Plasmids	Characteristics	Source
p15A-cm-ccdB-tetR-tetO-hyg	p15A replicon, cmR and hygR, inducible promter Ptet, PCR template to amplify p15A-cm fragment	Wang H, Li Z, Jia R, Hou Y, Yin J, Bian X, Li A, Müller R, Stewart AF, Fu J, Zhang Y. RecET direct cloning and Redαβ recombineering of biosynthetic gene clusters, large operons or single genes for heterologous expression. Nat Protoc. 11(7):1175-1190 (2016).
pR6K-cm-ccdB	pR6K replicon, cmR , PCR template to amplify R6K-cm fragment	Wang H, Li Z, Jia R, Hou Y, Yin J, Bian X, Li A, Müller R, Stewart AF, Fu J, Zhang Y. RecET direct cloning and Redαβ recombineering of biosynthetic gene clusters, large operons or single genes for heterologous expression. Nat Protoc. 11(7):1175-1190 (2016).
p15A-cm-ctp	p15A replicon, cmR, chitinimopeptin (ctp) biosynthetic gene cluster	This study
p15A-cm-P13-genta-ctp	p15A replicon, cmR, gentaR, ctp biosynthetic gene cluster under the control of constitutive endogenous promoter P13.	This study
p15A-phiC31-apra-P13-genta-ctp	p15A replicon, gentaR, apraR, with oriT-attP-phiC31 cassette and ctp biosynthetic gene cluster under the control of constitutive endogenous promoter P13.	This study
pR6K-cm-BGC6-apra	pR6K replicon, cmR and apraR, homologous arms for chpA knockout in C. subtsugae ATCC 31532 via double crossover	This study
pR6K-sacB-ctpD-KS-apra-haLR	pR6K replicon, apraR, sacB counter-selectable marker coding gene, homologous arms for ctpD-KS knockout in C. koreensis DSM 17726 via double crossover	This study

## Sheet: primers
Primers used in this study
Primers	Primer sequences (5’-3’)	Applications
Ex-C6-r6k-cm-F	CTACCCGATCGCCAACACTTAGTTCAACCTGTTGATAGTA	pR6K-cm-BGC6-apra construction
Ex-C6-r6k-cm-R	GGCGAACACTTTCATCAGGTAATCTGACCTCCTGGTTAT
Ex-C6-ha1-F	CATAACCAGGAGGTCAGATTACCTGATGAAAGTGTTCGC
Ex-C6-ha1-R	AACCTCGTTCCACTGAGCGTGGCGACGAACTCTCCAGTT
Ex-C6-apra-F	GAACTGGAGAGTTCGTCGCCACGCTCAGTGGAACGAGGTT
Ex-C6-apra-R	AGGTTGAAGGTGACGGTCAGAATCTGTACCTCCTTAAGTC
Ex-C6-ha2-F	GACTTAAGGAGGTACAGATTCTGACCGTCACCTTCAACCT
Ex-C6-ha2-R	TACTATCAACAGGTTGAACTAAGTGTTGGCGATCGGGTA
Check2-ex-C6-F	GATCGCGGCCAGTTGATC	check primers for inactivation of chp biosynthetic gene cluster
Check2-ex-C6-R	GTCCAGCGTGCGGTAGTC
ctp-F	AAGCCGCGGCCCAGGCCGCCGGTGGCGCCGGGCGAGGTCGACGCGGACTGCACCACGCCGGCCGGCGGCACCGCGAGCGGCTGATAACTCGAGAGATCCGAAAACC	p15A-cm-ctp construction
ctp-R	TGCGGCGGAAGGCCATGCGGTCGGCGAGGCGGTGACGGCGCTGGTCGACGAGGCCAGCGTGATCGTCGGGGTAGCGCATTGATTGAATTGATCATATGCGGATTAG
ctp-genta-F1	TTTTAATTGAAACATTATATTGCCGCCTATAAATGCGGCGATATTCCCATTTCACGGCGATATTTTAGGTGGCGGTACTTGGGTC	p15A-cm-P13-genta-ctp construction
ctp-genta-R1	GAGTGTCAACGCCGAGGCAGAGAAGGCACGAACCCAGTTGAC
ctp-P13-F	TCTGCCTCGGCGTTGACACTC
ctp-P13-R	GCATCGGGTGATTCGTTTATATATTCGTCGGAAGGAATTGGGAATGCATTGGAGGCCGTCGCCATGGCTCGCTCCTTGGGAAAACC
ctp-genta-F2	TTTTAATTGAAACATTATATT
ctp-genta-R2	GCATCGGGTGATTCGTTTATA
ctp-phiC31-F	TTACAACGTCGTGACTGGGAAACTCGAGCAGATCGCAAAAAACAGTACATACAGAAGGAGACATGAACTCTGATCATATGCGGATTAGAA	p15A-phiC31-apra-P13-genta-ctp construction
ctp-phiC31-R	AATTGATCATATGCGGATTAGAAAAACAACTTAAATGTGAAAGTGGGTCTTAAGCATGCTACGTATGCCGTAGTGCTTGGATTCTCACCA
ctp-ins-check-1	ACCTTCAACAACCATCCGCTTG	check primer for ctp biosynthetic gene cluster in Caldimonas brevitalea DSM 7029Δglb host
ctp-ins-check-2	AGCGCCACCGTCTCGCAGTAG
ctp-ins-check-3	TGGGTCGGGCTGTTCATCAAC
ctp-ins-check-4	AGCCGAGCAGGTCTTCCCACAG
ctp-ins-check-5	AAGTGGCCGAACCGTTCCTGC
ctp-ins-check-6	AGCGGCAGGCGGAACACGTC
ctpD-KS-del-haL-F	ACCCGCGCGATTTACTTTTCGACCTAAGGACCGCTCGAACTCGAA	pR6K-sacB-ctpD-KS-apra-haLR construction
ctpD-KS-del-haL-R	ACGTGAACCTCGTTCCACTGAGCGTTCTGTGCGATTTGGCGTAAG
ctpD-KS-del-haR-L	CGATGCCGCTCGCCAGTCGATTGGCCGCTGGCCAGTGACTCCTCC
ctpD-KS-del-haR-R	GTTATGAGTAAACTTGGTCTGACAGCTCGACCTGCTCGCAGAAAC
ctpD-KS-del-check F	GTTTCCCGTTCCGCATCCC	check primer for deletion of ctpD-KS in Chitinimonas koreensis DSM 17726
ctpD-KS-del-check R	TCCAGCGCCAGGTGCACGT
* The underlined bases represent homologous arms (HAs).
